# Supplementary material
Source: PubMed Central journal article supplement (PMC3040569)
Supplement: NIHMS33224-supplement-supplement.pdf [file NIHMS33224-supplement-supplement.pdf]

## O'Neill *et al* - SI guide

Supplementary Table 1. A comparison of protein sequence identity/similarity, for several clock-relevant genes, between *Ostreococcus tauri* and *Homo sapiens*.

Supplementary Table 2. A summary of literature reports in other taxa for the reported targets of drugs that modulate free-running period in *Ostreococcus tauri*.

Supplementary Figure 1. Representative plots of circadian rhythms of gene expression in *O. tauri* following constant darkness.

Supplementary Figure 2. Sequence, expression and post-translational modification of PRX in *O. tauri*.

Supplementary Figure 3. The effects of inhibition of cellular RNA synthesis or cytosolic translation upon transcriptional and translational bioluminescent clock reporters under constant light.

Supplementary Figure 4. Phase-resetting effects of pulsed treatment with inhibitors of cellular RNA synthesis or cytosolic translation, in 'wedge' experiments.

Supplementary Figure 5. Representative and grouped data showing similar pharmacological actions on circadian period in *O. tauri* to those reported in other taxa.

Supplementary Figure 6. Representative and grouped data showing the effects of pharmacological modulators of circadian period in *O. tauri*, in the absence of transcription.

# O'Neill *et al*, Supplementary Table 1

| Putative <i>O. tauri</i> drug target | Accession  | Closest <i>H. sapiens</i> homologue | Accession      | Sequence Identity (%) | Sequence Similarity (%) | E-value (NCBI Blast, BLOSSUM 62) |
|--------------------------------------|------------|-------------------------------------|----------------|-----------------------|-------------------------|----------------------------------|
| DNA topoisomerase II                 | CAL56339   | DNA topoisomerase II                | AAA61209.1     | 54                    | 70                      | 0                                |
| HSP90                                | CAL56087   | HSP90                               | NP_005339.3    | 67                    | 85                      | 6.00E-170                        |
| PP2A                                 | CAL51458.1 | PP2A                                | NP_060931.2    | 51                    | 62                      | 4.00E-127                        |
| CK1                                  | CAL52491   | CK1                                 | NP_001884.2    | 72                    | 82                      | 2.00E-126                        |
| GSK3                                 | CAL51449.1 | GSK3                                | NP_001139628.1 | 60                    | 74                      | 6.00E-125                        |
| MAPK                                 | CAL55559.1 | MAPK                                | NP_620407.1    | 54                    | 71                      | 6.00E-103                        |
| CK2                                  | CAL52182   | CK2                                 | CAI18393.2     | 58                    | 71                      | 1.00E-62                         |
| Proteasome beta subunit              | CAL50436   | Proteasome subunit                  | NP_002786.2    | 50                    | 67                      | 8.00E-51                         |
| Adenylyl cyclase                     | CAL54153   | No relevant hits <sup>1</sup>       | -              | -                     | -                       | -                                |

  

| <i>O. tauri</i> clock gene | Accession | Closest <i>H. sapiens</i> homologue | Accession  | Sequence Identity (%) | Sequence Similarity (%) | E-value (NCBI Blast, BLOSSUM 62) |
|----------------------------|-----------|-------------------------------------|------------|-----------------------|-------------------------|----------------------------------|
| CCA1                       | AAU14271  | MYB-like <sup>2</sup>               | BAB67808.1 | 38                    | 75                      | 2.00E-05                         |
| TOC1                       | AAU14274  | No relevant hits                    | -          | -                     | -                       | -                                |

  

| <i>H. sapiens</i> clock gene | Accession | Closest <i>O. tauri</i> homologue                     | Accession  | Sequence Identity (%) | Sequence Similarity (%) | E-value (NCBI Blast, BLOSSUM 62) |
|------------------------------|-----------|-------------------------------------------------------|------------|-----------------------|-------------------------|----------------------------------|
| Period2                      | ABM64216  | DNA repair and transcription factor XPB1 <sup>3</sup> | CAL53063.1 | 25                    | 40                      | 0.3                              |
| Bmal1b                       | BAA19935  | Unnamed protein product <sup>3</sup>                  | CAL56979.1 | 36                    | 56                      | 0.18                             |

**Table S1. A comparison of protein sequence identity/similarity, for several clock-relevant genes, between *Ostreococcus tauri* and *Homo sapiens*.**

<sup>1</sup> *O. tauri* encodes two proteins (accessions: CAL50189.1, CAL54153.1) that are annotated as members of the class III nucleotidyl cyclase superfamily. These have little significant sequence homology with mammalian adenylyl cyclases (also class III). Due to the mode of action of 9-(Tetrahydro-2-furanyl)-9H-purin-6-amine, 9-THF-Ade (THFA) - a post-transition state, non-competitive p-site ligand that binds the catalytic site by mimicking cAMP, it is plausible that this drug is preferentially active against adenylyl cyclase in *O. tauri* despite an clear divergence of primary protein sequence.

<sup>2</sup> Not implicated in the mammalian clockwork.

<sup>3</sup> Not implicated in the plant clockwork.

## O'Neill *et al*, Supplementary Table 2

| Compound          | Target                                          | Notes                                                                                                                                            | Reference(s)                                                                                     |
|-------------------|-------------------------------------------------|--------------------------------------------------------------------------------------------------------------------------------------------------|--------------------------------------------------------------------------------------------------|
| amsacrine-HCL     | DNA topo II                                     | Shown to shorten period in mammalian cells                                                                                                       | Isojima et al, PNAS, 2009                                                                        |
| SB216763          | GSK3                                            | Shown to shorten period in mammalian cells, GSK3 also implicated in the <i>Drosophila</i> clock                                                  | Isojima et al, PNAS, 2009<br>Hirota et al, PNAS, 2008                                            |
| LiCl <sub>2</sub> | GSK3                                            | Increases period in a wide range of organisms, shown to act through GSK3 in mammalian cells                                                      | Iitaka et al, J Biol Chem, 2005<br>Yin et al, Science, 2006                                      |
| IC261             | CK1                                             | Lengthens period in mammalian cells and in <i>Neurospora</i>                                                                                     | Eide et al, Mol Cell Biol, 2005;<br>Querforth et al, Cold Spring Harb Symp Quant Bio, 2007;      |
| D4476             | CK1                                             | Lengthens period in mammalian cells                                                                                                              | Reischl et al, J Biol Rhythms, 2007                                                              |
| DMAT              | CK2                                             | Increases period in mammalian tissue <i>in vitro</i> .                                                                                           | Maier et al, Genes Dev, 2009<br>Mizoguchi et al, Int Rev Cytol, 2006                             |
| TBB               | CK2                                             | CK2 is also heavily implicated in <i>Arabidopsis</i> , <i>Neurospora</i> and <i>Drosophila</i> clock mechanisms                                  | Miyata, Mol Cell Biol, 2004                                                                      |
| nicotinamide      | Ca <sup>2+</sup> signaling &/ or NAD metabolism | Nicotinamide increases period in <i>Arabidopsis</i> and mammalian cells                                                                          | Dodd et al, Science, 2007;<br>Asher, Cell, 2008                                                  |
| BAPTA             | Ca <sup>2+</sup> signaling                      | Ca <sup>2+</sup> signaling is also heavily implicated in <i>Drosophila</i> and mammalian clock mechanisms                                        | Harrisingh et al, J Neurosci, 2007;<br>Lundkvist et al, J Neurosci, 2005;<br>Ikeda, Neuron, 2003 |
| SP600125          | JNK                                             | Shown to increase period in mammalian tissues and cells <i>in vitro</i> , also inhibits CK1, <i>in vitro</i>                                     | Chansard et al, Neuroscience, 2007;<br>Isojima et al, PNAS, 2009<br>Zhang et al, Cell, 2009      |
| THFA              | adenylyl cyclase                                | Increases period in mammalian tissues <i>in vitro</i> and <i>in vivo</i>                                                                         | O'Neill et al, Science, 2007                                                                     |
| 9-CPA             | adenylyl cyclase                                | Increases period in mammalian tissues <i>in vitro</i>                                                                                            | O'Neill et al, Science, 2007                                                                     |
| calyculin A       | PP2A                                            | Increases period in mammalian tissues <i>in vitro</i>                                                                                            | Eide et al, Mol Cell Biol, 2005;                                                                 |
| geldanamycin      | hsp90                                           | Increases free-running period in <i>Drosophila</i> (w <sup>1118</sup> )                                                                          | Hung et al, J Biol Rhythms, 2009                                                                 |
| MG132             | proteasome                                      | Increases period in mammalian tissues <i>in vitro</i>                                                                                            | Eide et al, Mol Cell Biol, 2005;                                                                 |
| trichostatin A    | Histone deacetylase inhibitor                   | Regulates clock gene expression in mammalian cells and SCN <i>in vitro</i> , reversible histone modification also implicated in other organisms. | Naruse et al, Mol Cell, Biol, 2004.<br>Perales and Mas, Plant Cell, 2007.                        |
| SD169             | P38α MAPK                                       | Implicated as an output mechanism in <i>Neurospora</i> (negative control)                                                                        | Vitalini, PNAS, 2007                                                                             |

**Table S2. A summary of literature reports in other taxa for the reported targets of drugs that modulate free-running period in *Ostreococcus tauri*.**

## O'Neill *et al*, Supplementary Figure 1

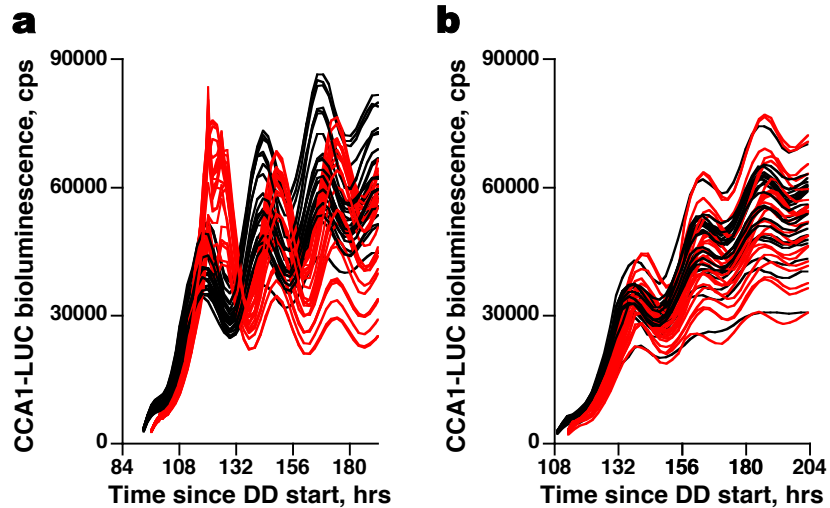

**Supplementary Figure 1. Representative plots of circadian rhythms of gene expression in *O. tauri* following constant darkness.** Two representative plots showing recovery of rhythmic bioluminescence upon transfer at 4 hour intervals from constant darkness into constant light. An additional 4 hours in constant darkness separate the red from black traces in each case. Whilst plot **a** shows a clear difference in circadian phase, plot **b** does not, a departure from absolute phase resetting by light.

## O'Neill *et al*, Supplementary Figure 2

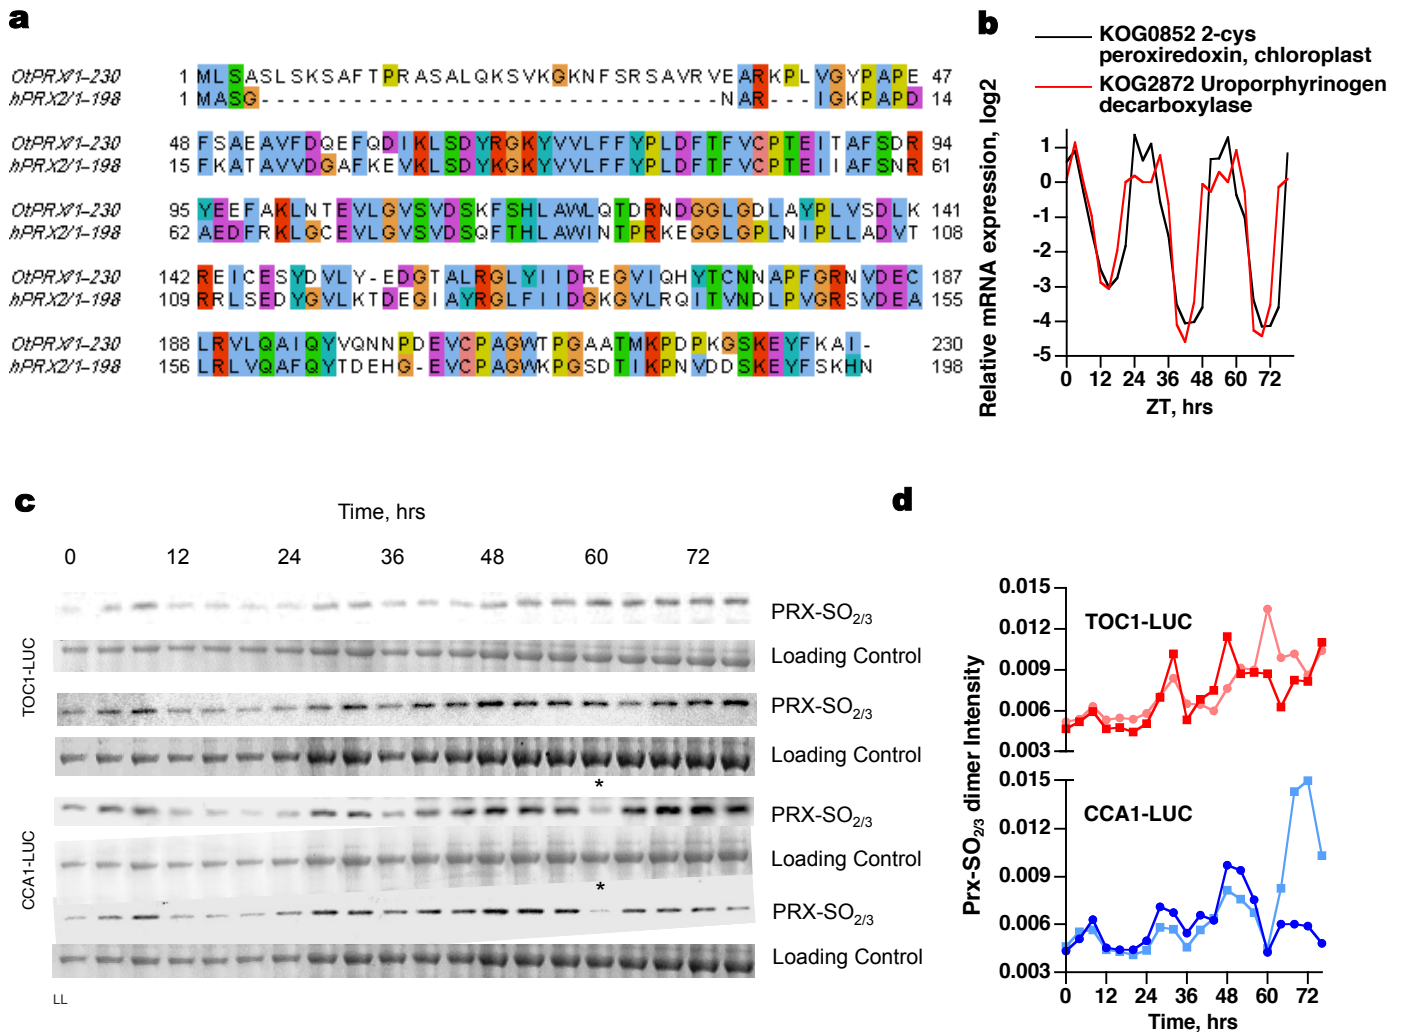

**Supplementary Figure 2. Sequence, expression and post-translational modification of PRX in *O. tauri*.** **a**, Sequence alignment of *O. tauri* thioredoxin peroxidase and human PRX2, black line indicates the highly conserved region surrounding the catalytic cysteine residue that is pertinent to the following western blots and those in Figure 2. **b**, *O. tauri* PRX is rhythmically transcribed under 12:12 hour light:dark cycles in phase with other afternoon-expressed transcripts (adapted from Monnier *et al*, 2010, BMC Genomics). **c**, Immunoblots show altered rhythms of hyperoxidised peroxiredoxin (PRX-SO<sub>2/3</sub>) in constant light for mutant *O. tauri* lines that express an additional genomic copy of TOC1 (TOC1-LUC), previously shown to display longer period under constant conditions compared with lines expressing an extra copy of CCA1 (CCA1-LUC), indicated by the decrease in signal at 60 hours in the controls (\*). **d**, Plots of individual intensities from **c**.

# O'Neill *et al*, Supplementary Figure 3

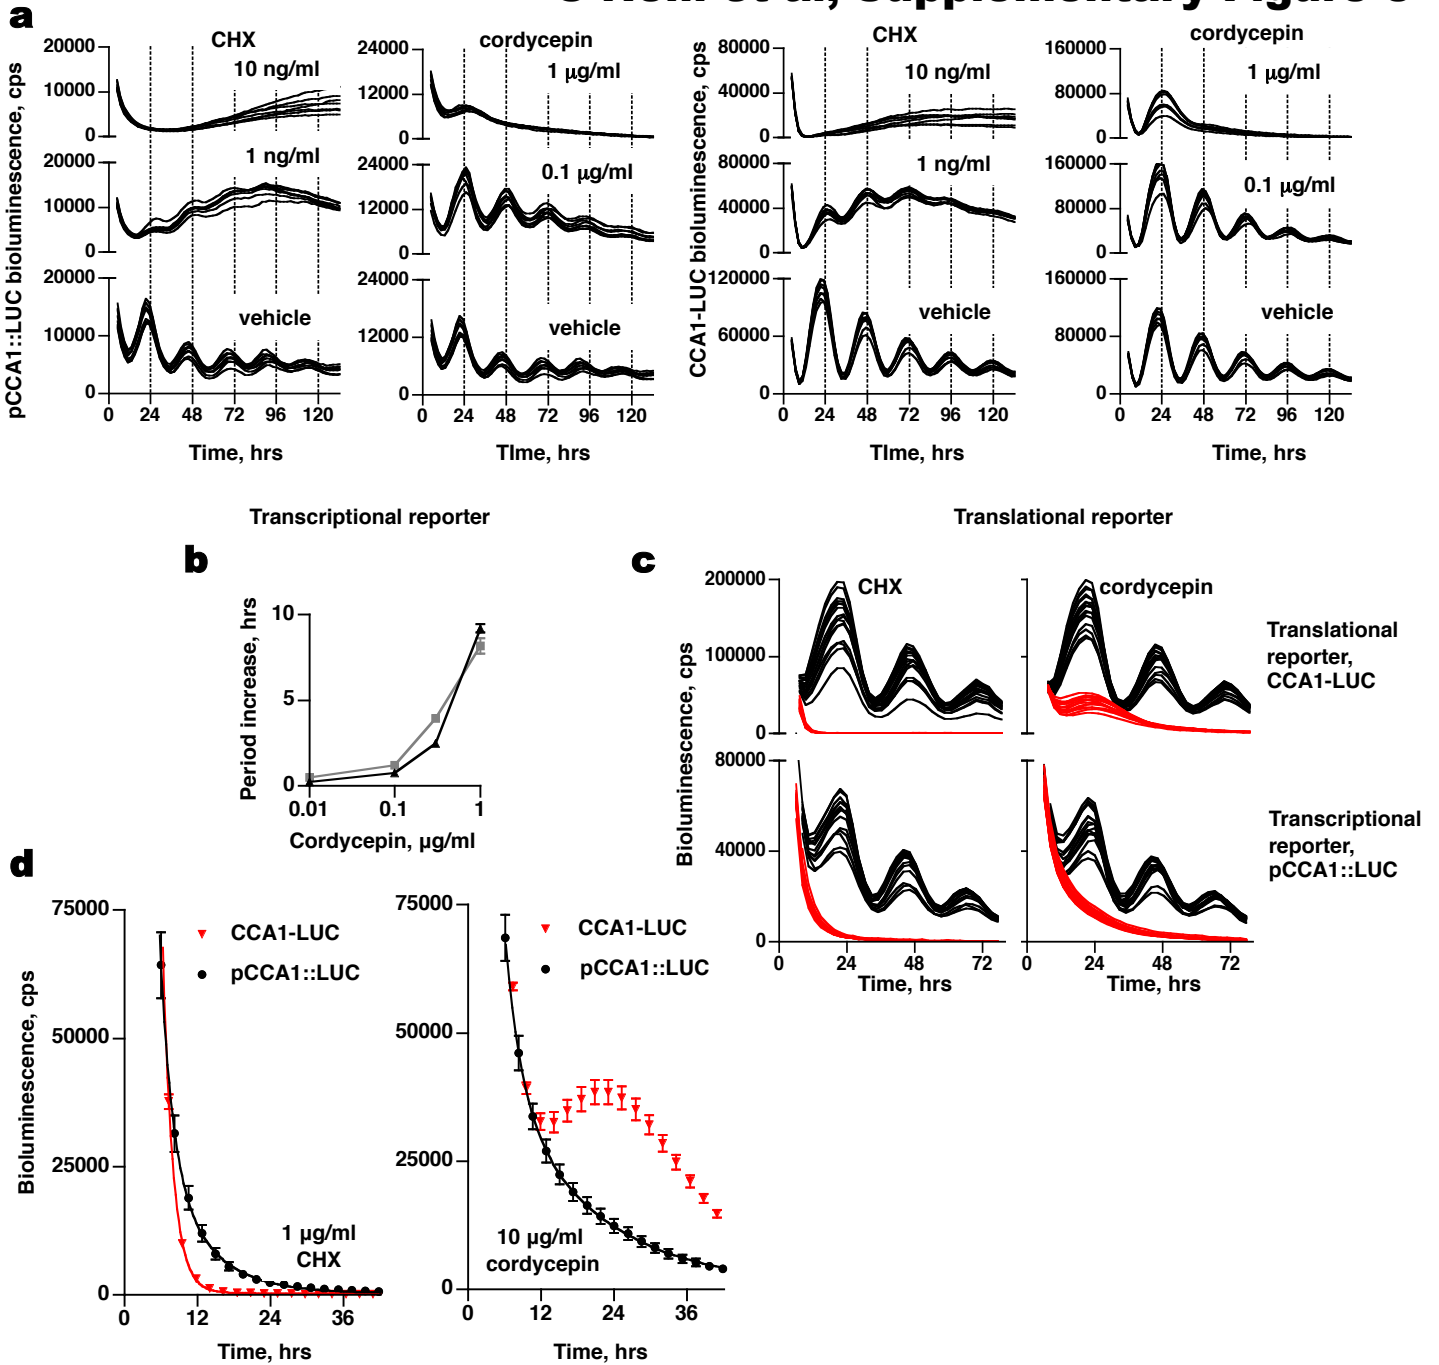

## Supplementary Figure 3. The effect of inhibition of cellular RNA synthesis or cytosolic translation upon transcriptional and translational bioluminescent clock reporters under constant light.

**a**, Representative plots showing the effect of increasing concentrations of CHX and cordycepin on transcriptional and translational reporters ( $n = 8$ ). **b**, The effect on circadian period due to reduced cellular transcription rates (black, translational reporter; grey, transcriptional reporter; error bars  $\pm$  SEM; 2-way ANOVA,  $p < 0.0001$  for concentration effect,  $n = 8$ ). **c**, The effect of maximal inhibition of transcription (cordycepin) or cytosolic translation (CHX) upon transcriptional or translational bioluminescent clock reporters (black, vehicle; red, drug treatment;  $n=16$ ). **d**, Expanded from **c**, grouped data from lines expressing the translational CCA1-LUC reporter in the presence of 10 µg/ml cordycepin deviate from the exponential decay exhibited by the transcriptional pCCA1::LUC reporter under the same conditions, or either reporter in the presence of 1 µg/ml CHX ( $R^2 \geq 0.98$  for all three curve fits; error bars  $\pm$  SEM,  $n = 16$ ).

O'Neill *et al*, Supplementary Figure 4-1

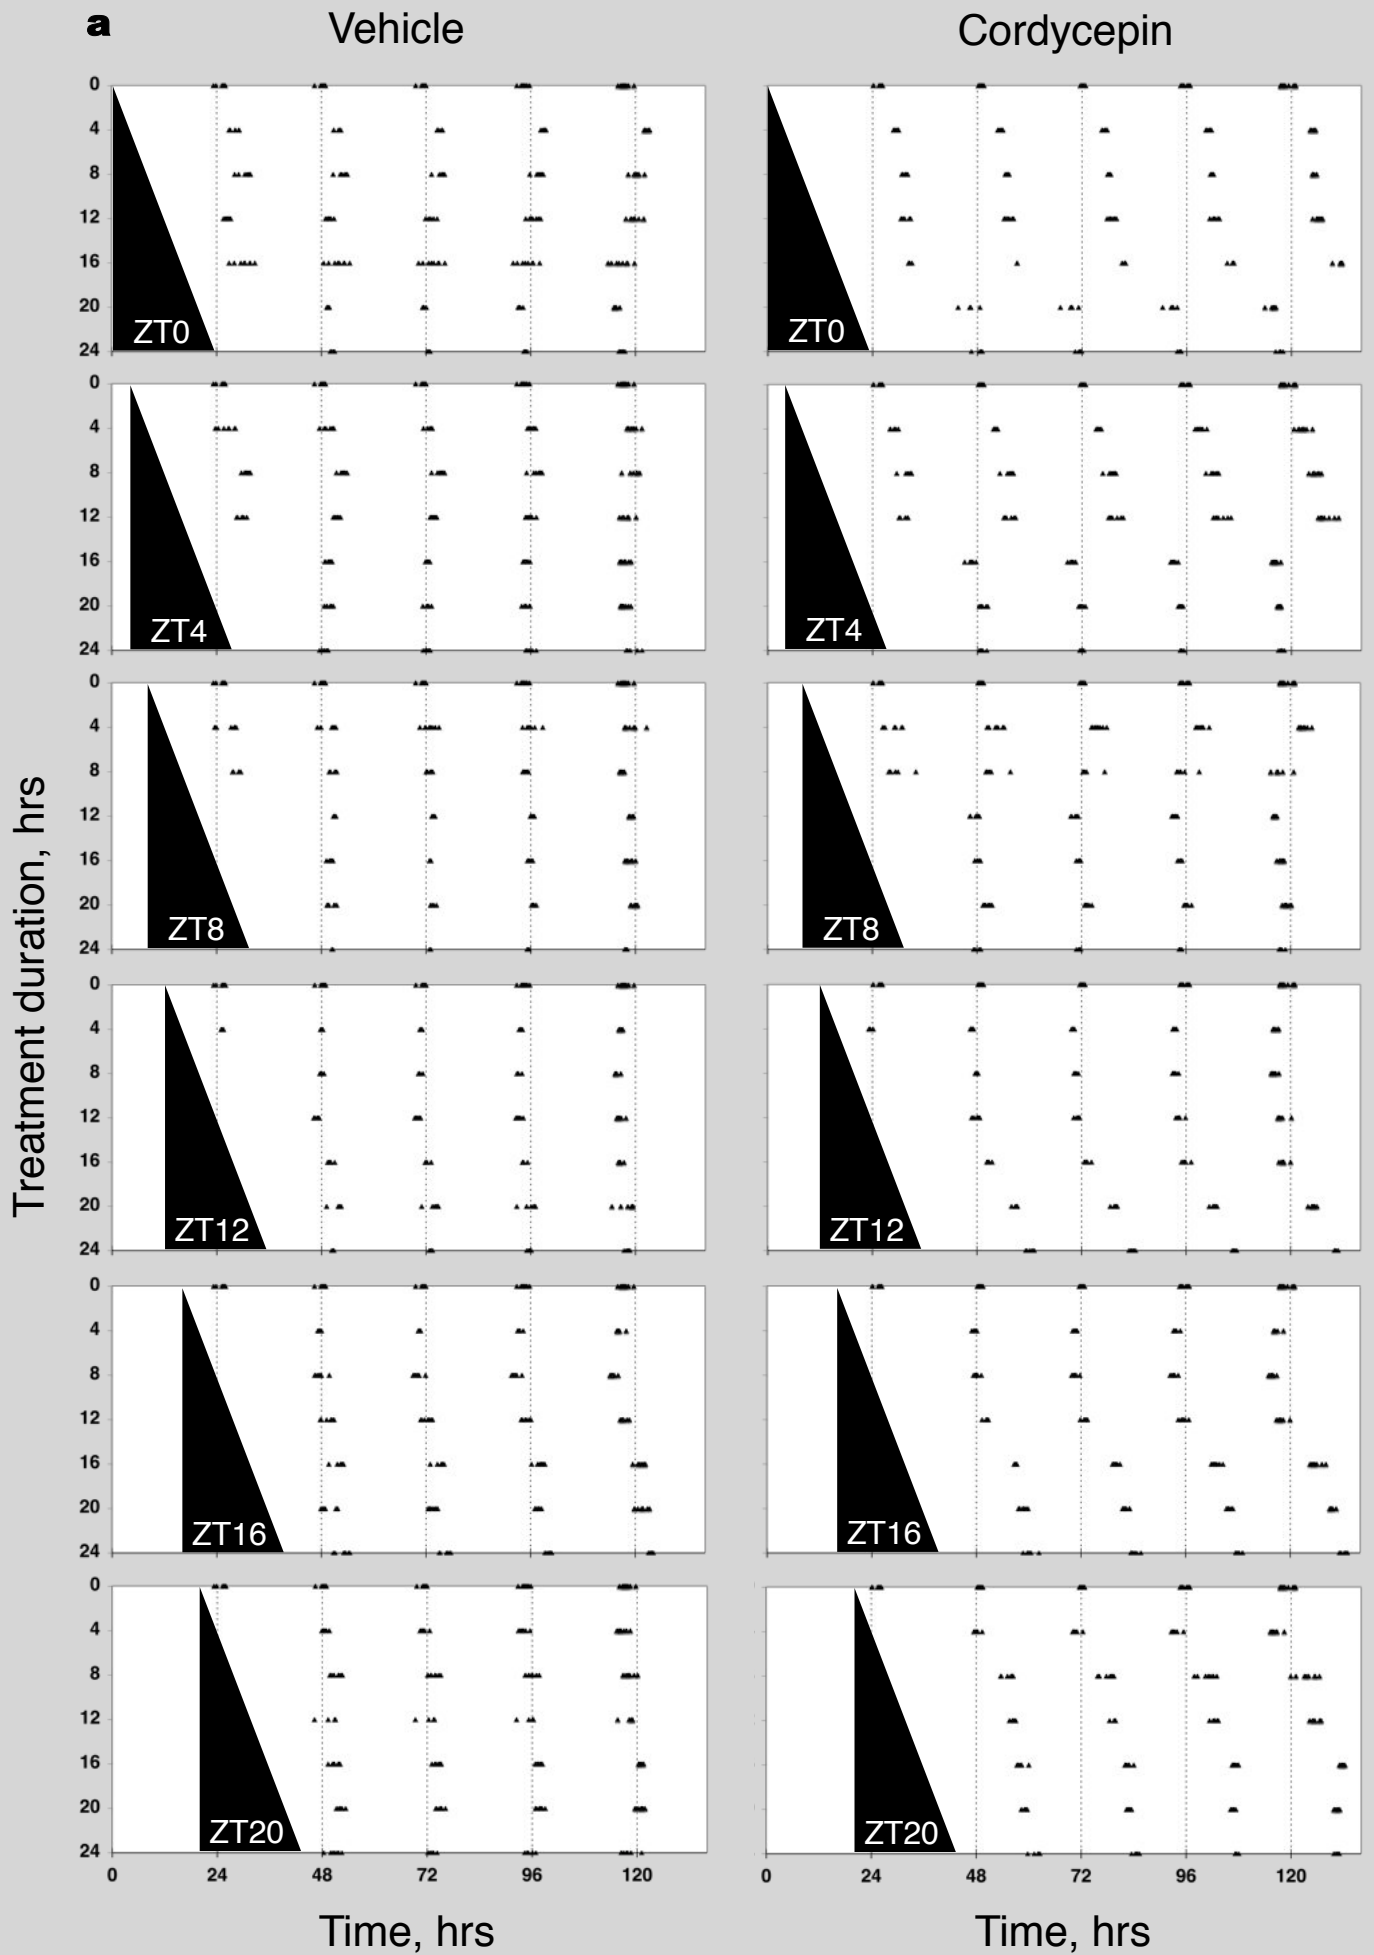

O'Neill *et al*, Supplementary Figure 4-2

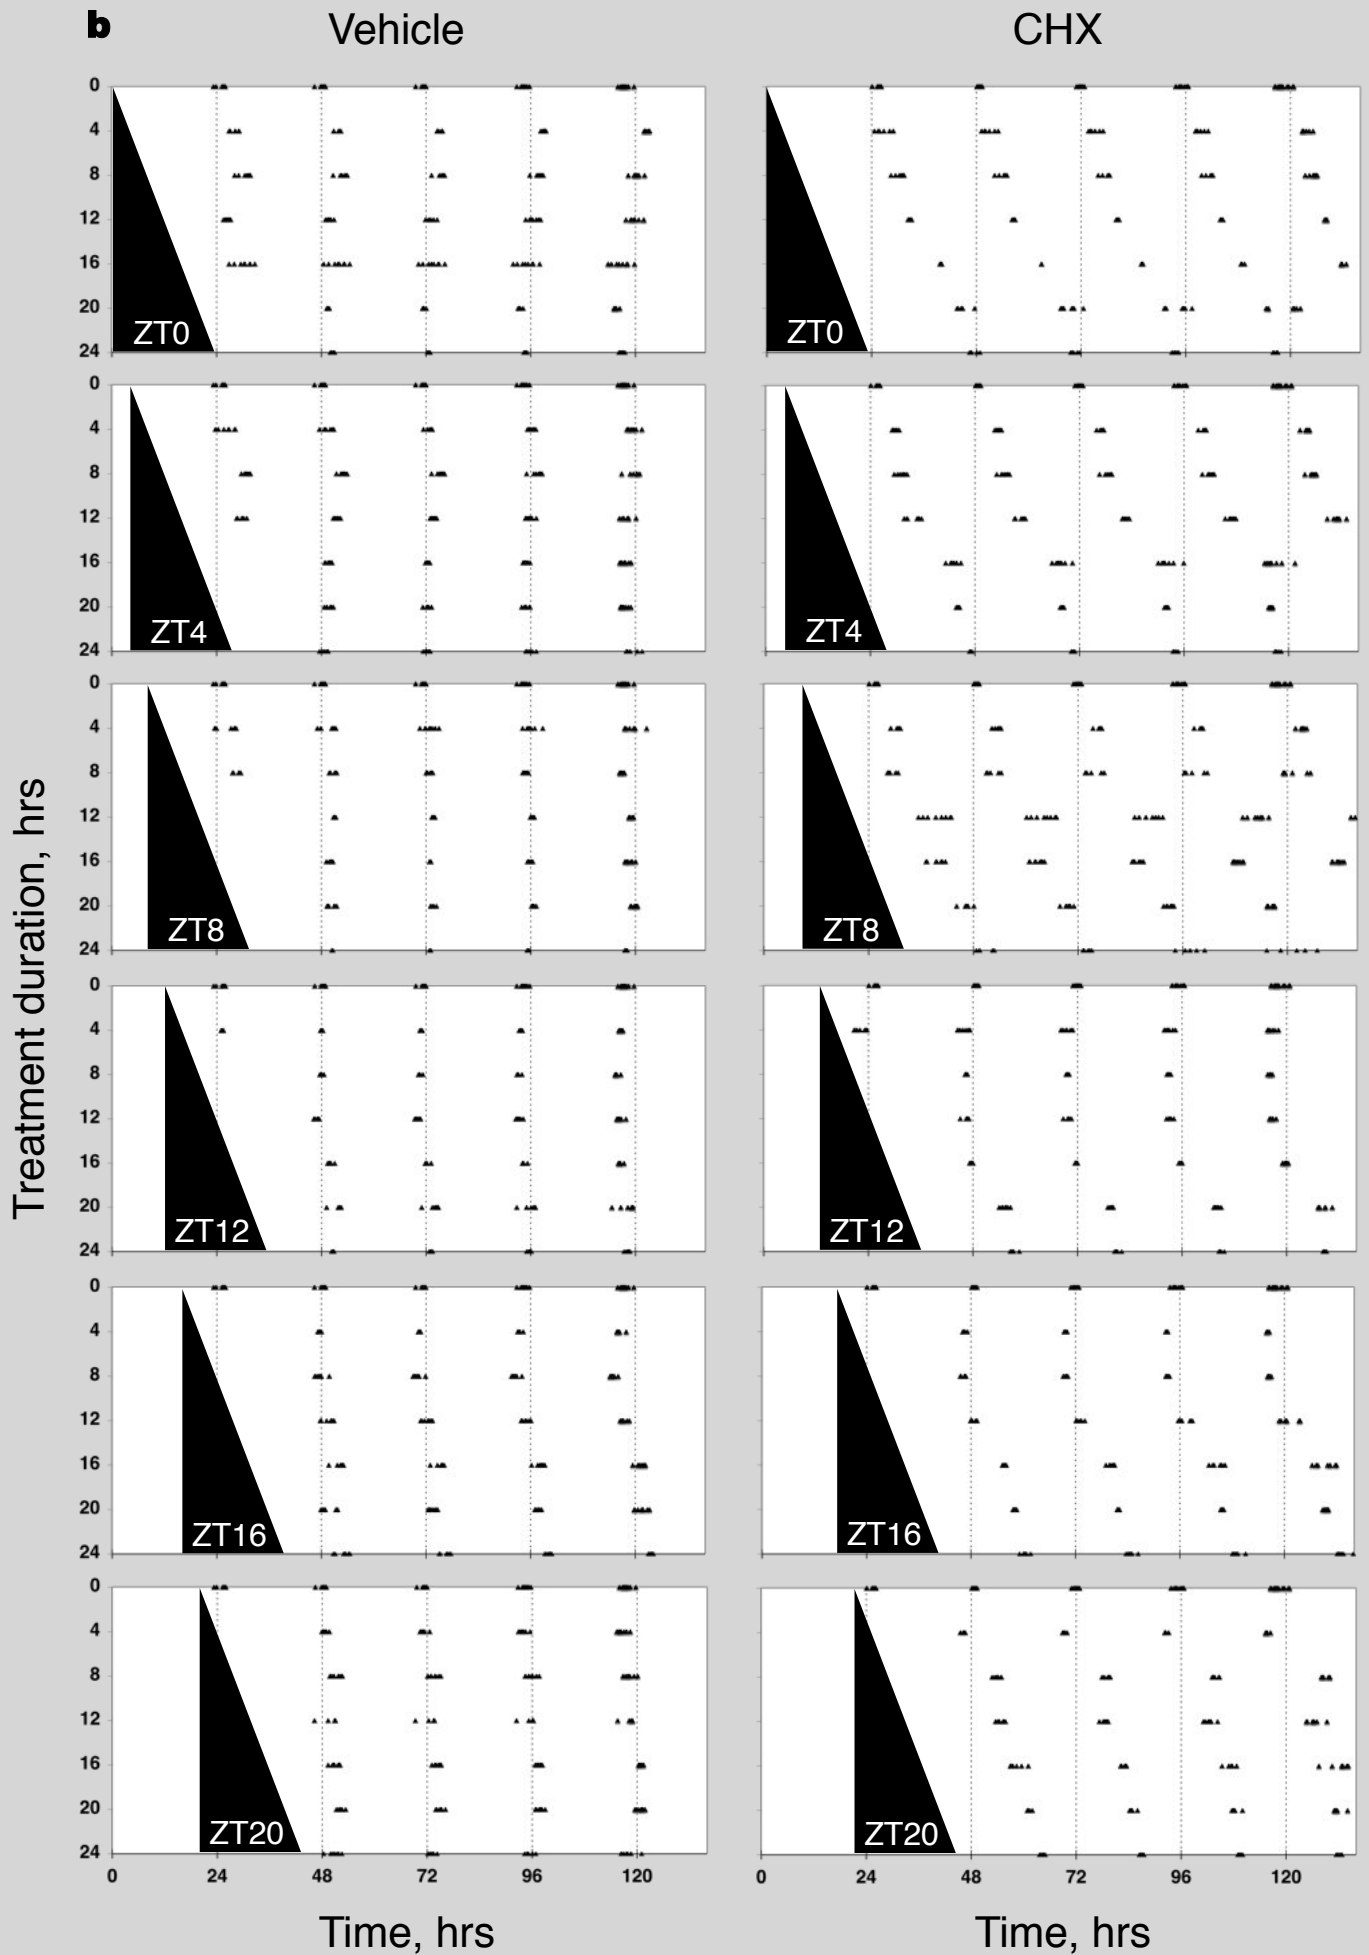



# O'Neill *et al*, Supplementary Figure 4-3

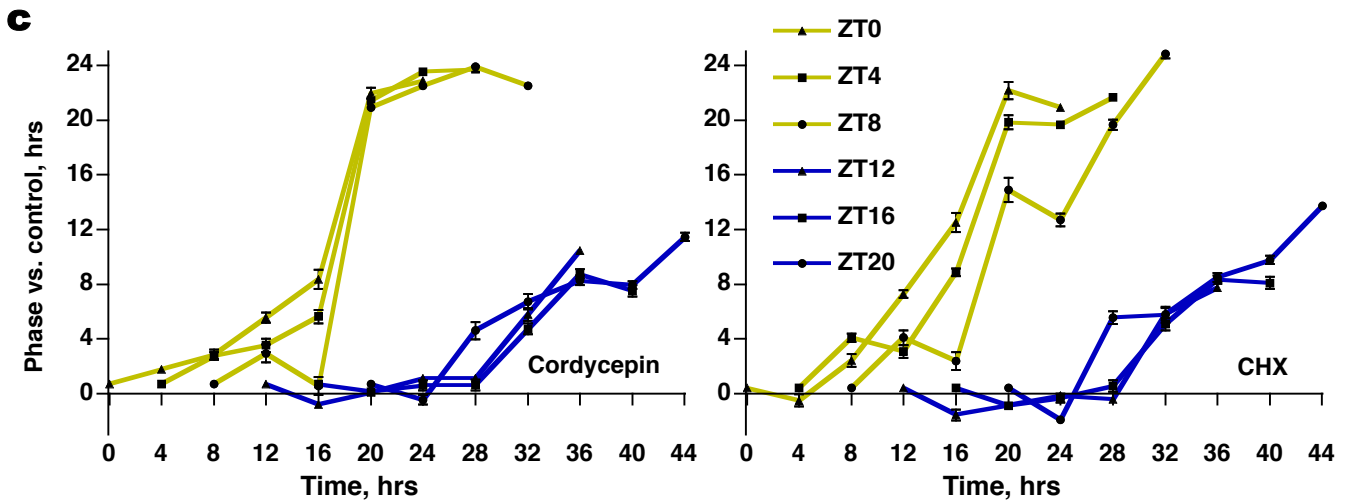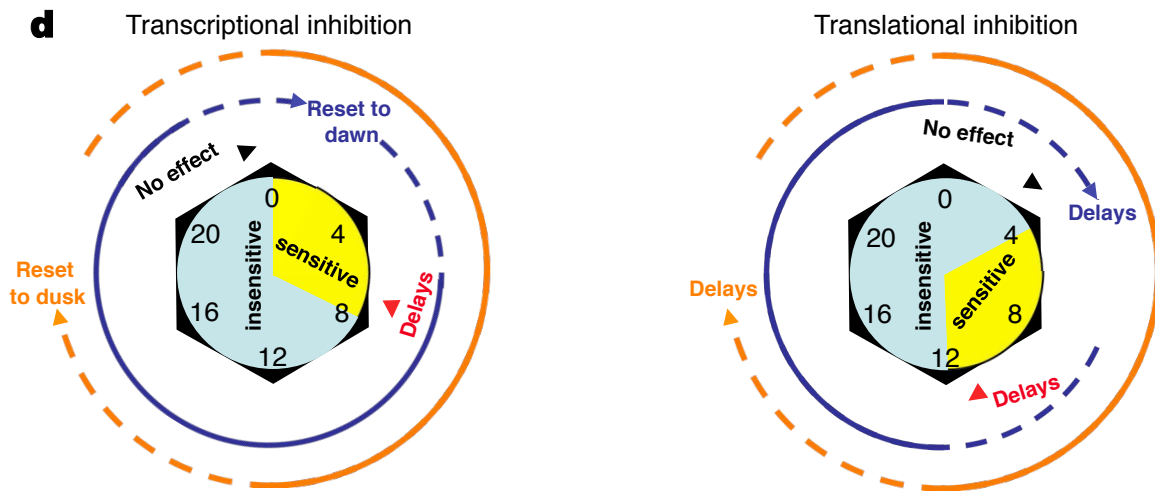

**Supplementary Figure 4. Individual and grouped data from chemical ‘wedge’ experiment.** **a**, Peak times of CCA1-LUC expression in constant light for individual replicates entrained under LD, following treatment with vehicle or cordycepin starting from ZT0, 4, 8, 12, 16, or 20 extending for 4-hour increments up to 24 hours ( $n > 5$ ). **b**, Peak times of CCA1-LUC expression in constant light for individual replicates entrained under LD, following treatment with vehicle or CHX starting from ZT0, 4, 8, 12, 16, or 20 extending for 4-hour increments up to 24 hours ( $n > 5$ ). **c**, An alternate plot of Figure 3c shows experimentally derived phases relative to vehicle controls ( $n > 5$ , error bars  $\pm$  SEM). Yellow and blue lines indicate treatments beginning during subjective day and night, respectively. **d**, Cartoon schematic summarizing the experimental data shown in **a**, **b** and **c**; dotted lines represent different windows for treatment start times, solid lines represent continued treatment, arrows represent end of treatment with text describing the effect on phase relative to controls.

# O'Neill *et al*, Supplementary Figure 5-1

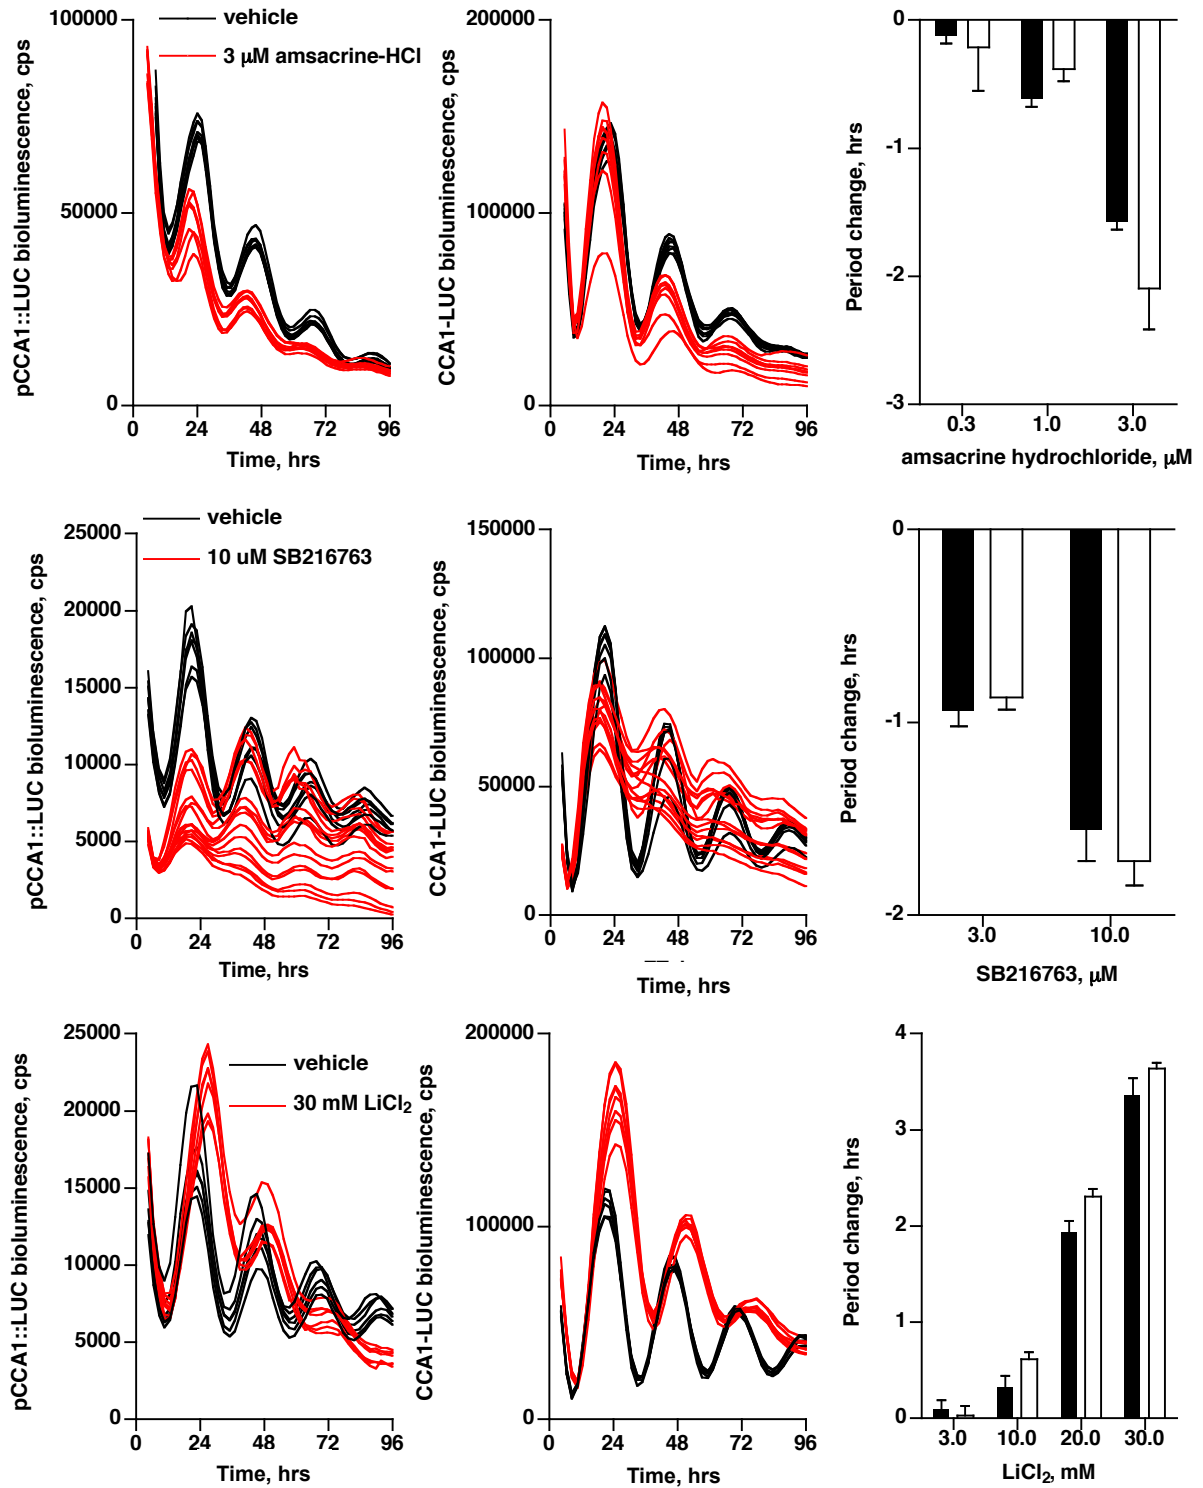

# O'Neill *et al*, Supplementary Figure 5-2

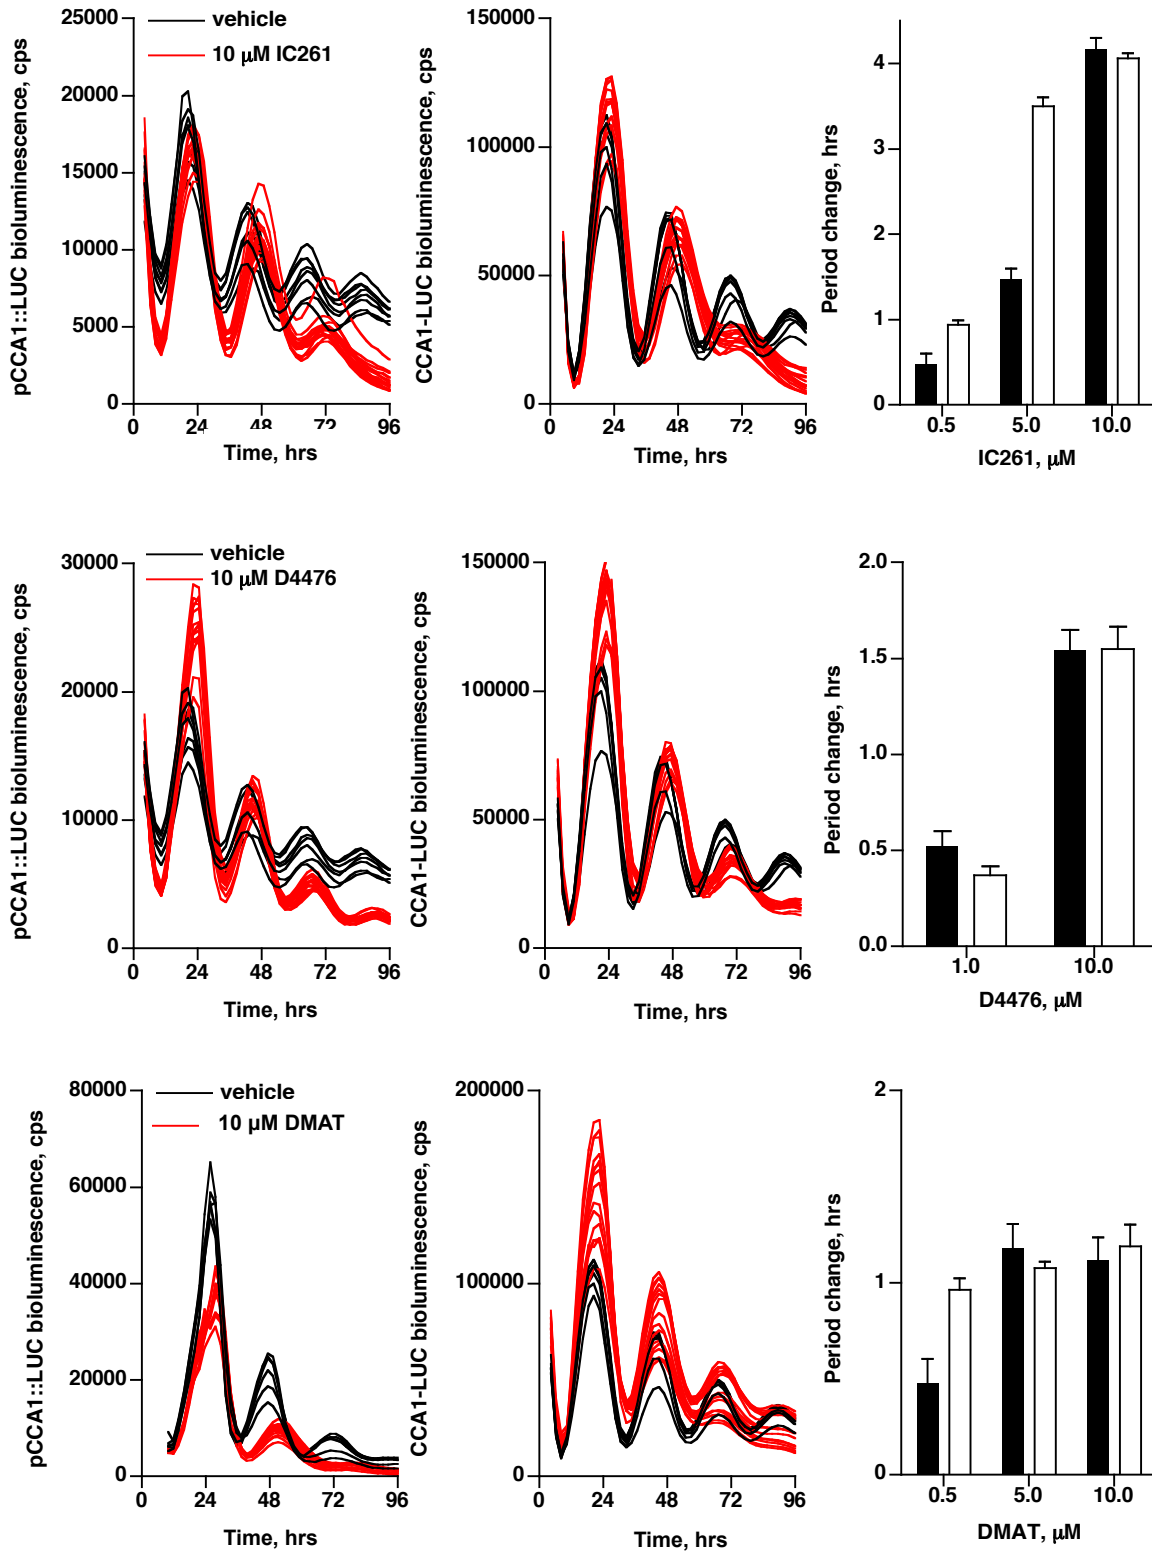

# O'Neill *et al*, Supplementary Figure 5-3

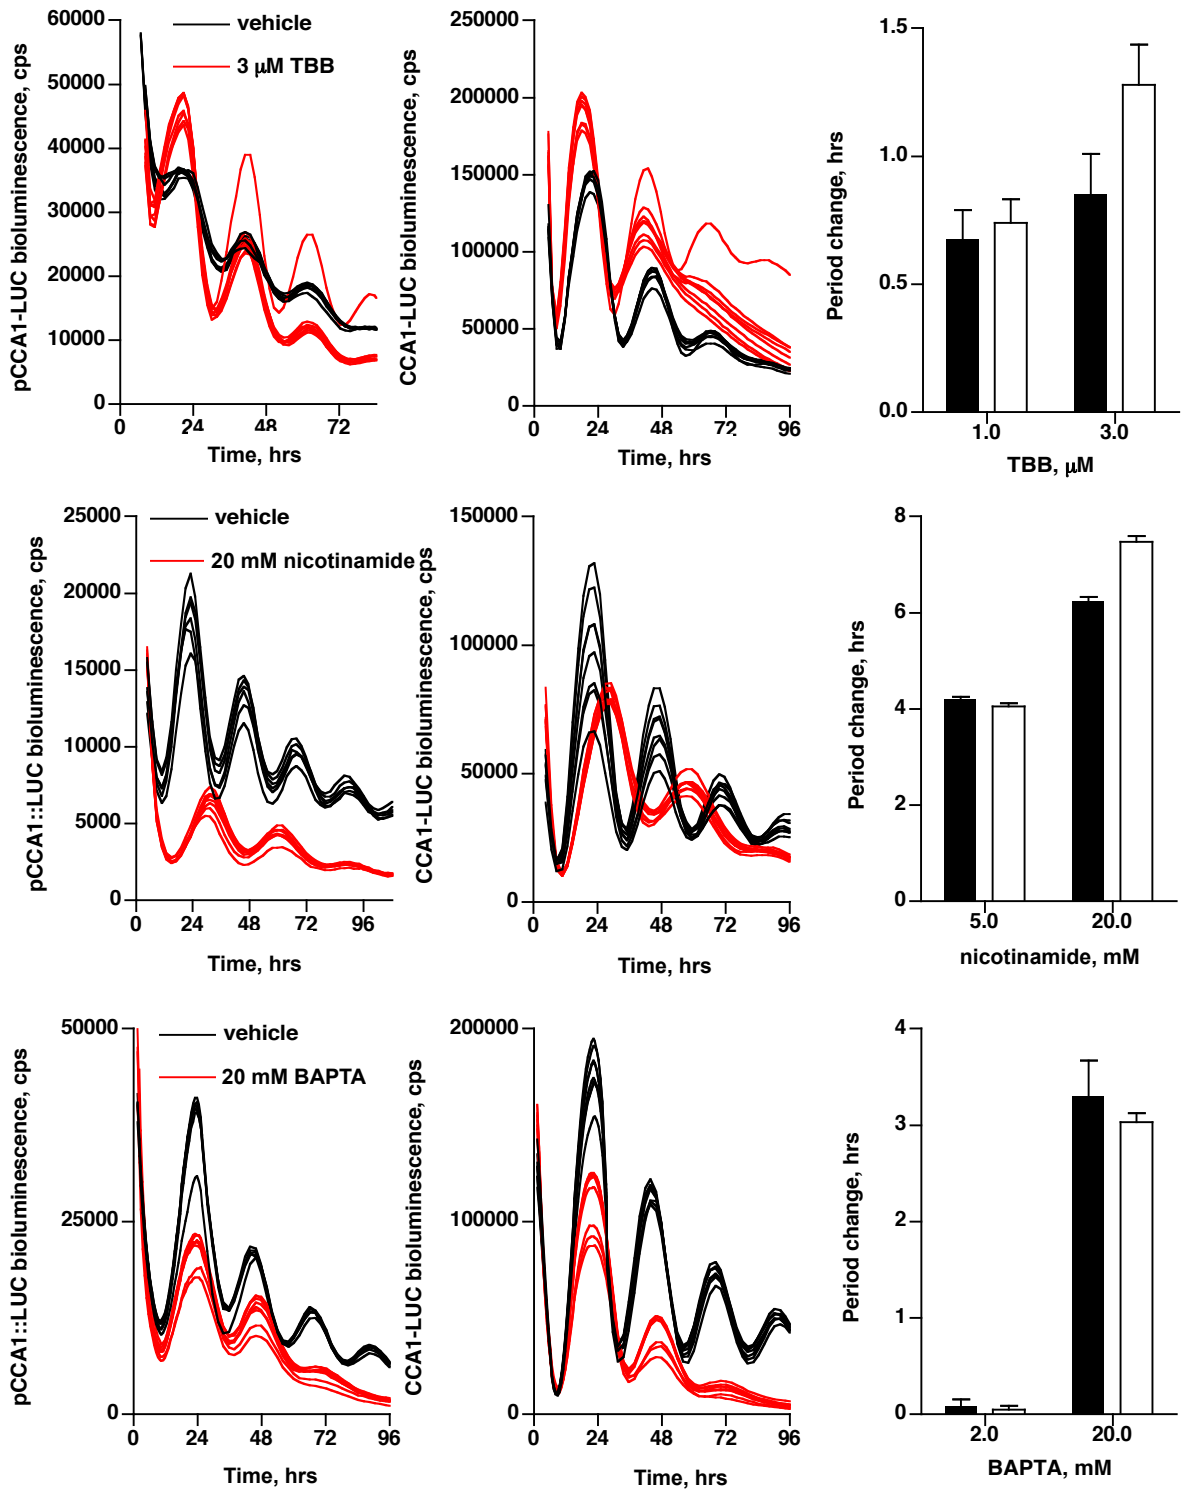

# O'Neill *et al*, Supplementary Figure 5-4

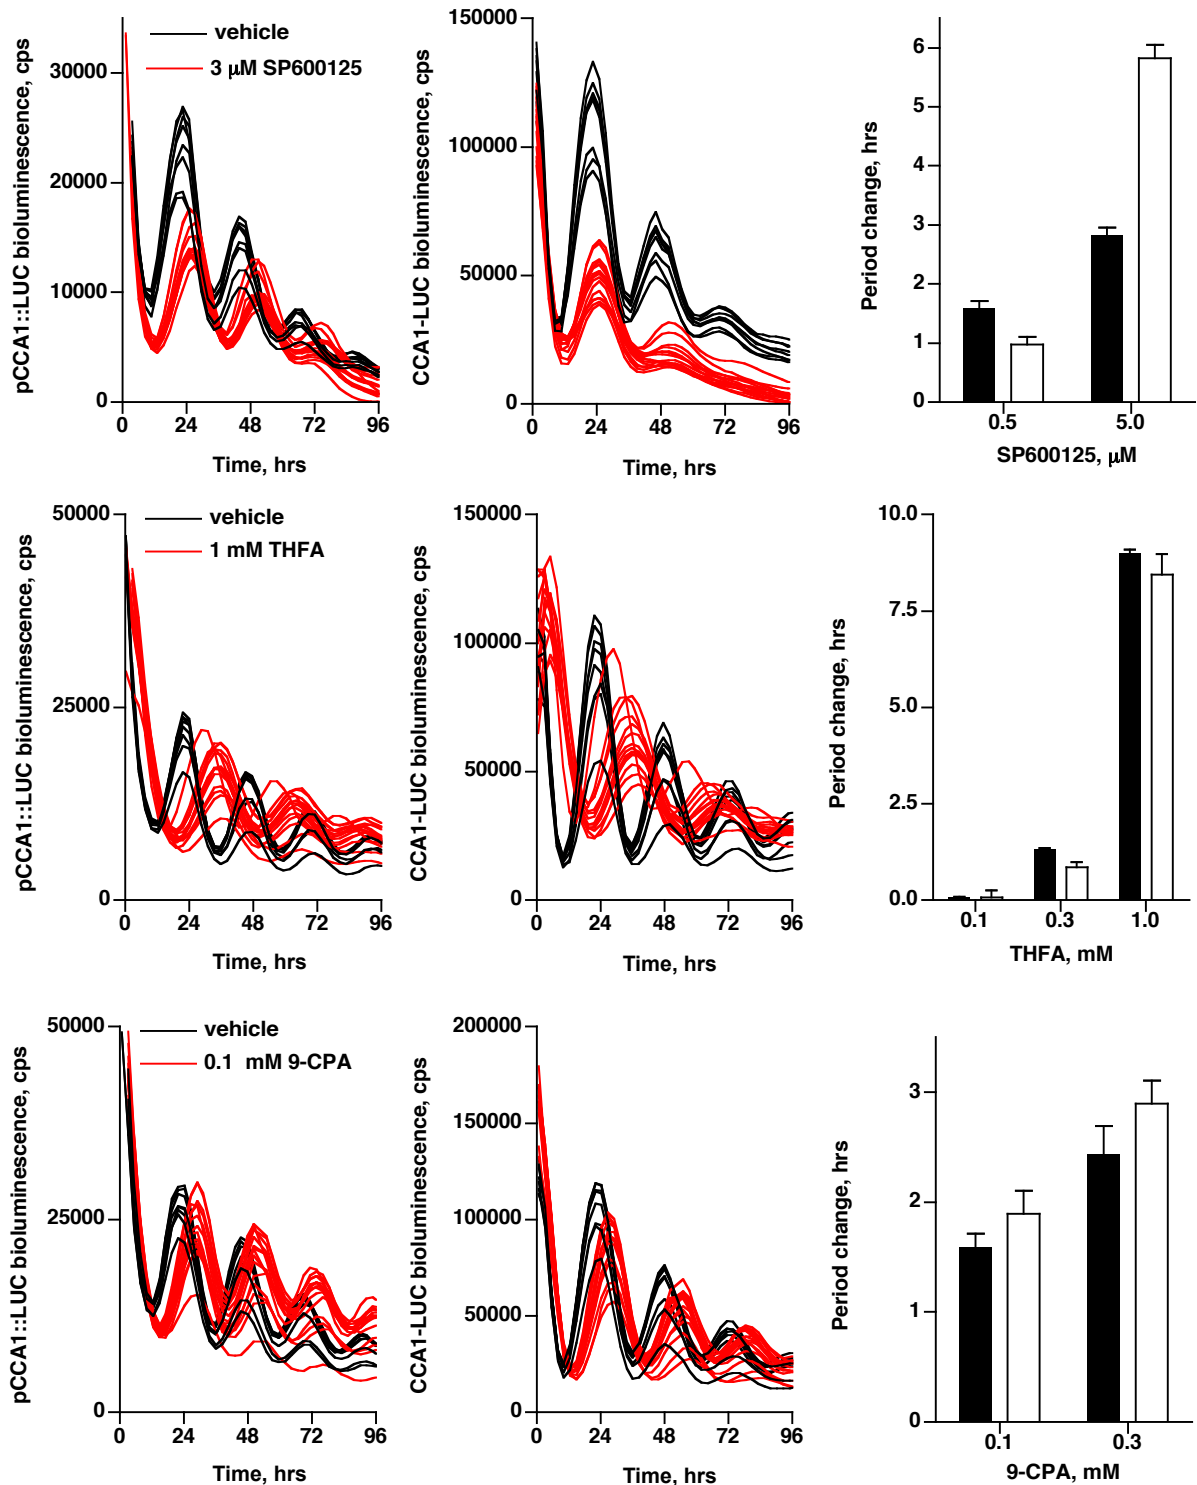

# O'Neill *et al*, Supplementary Figure 5-5

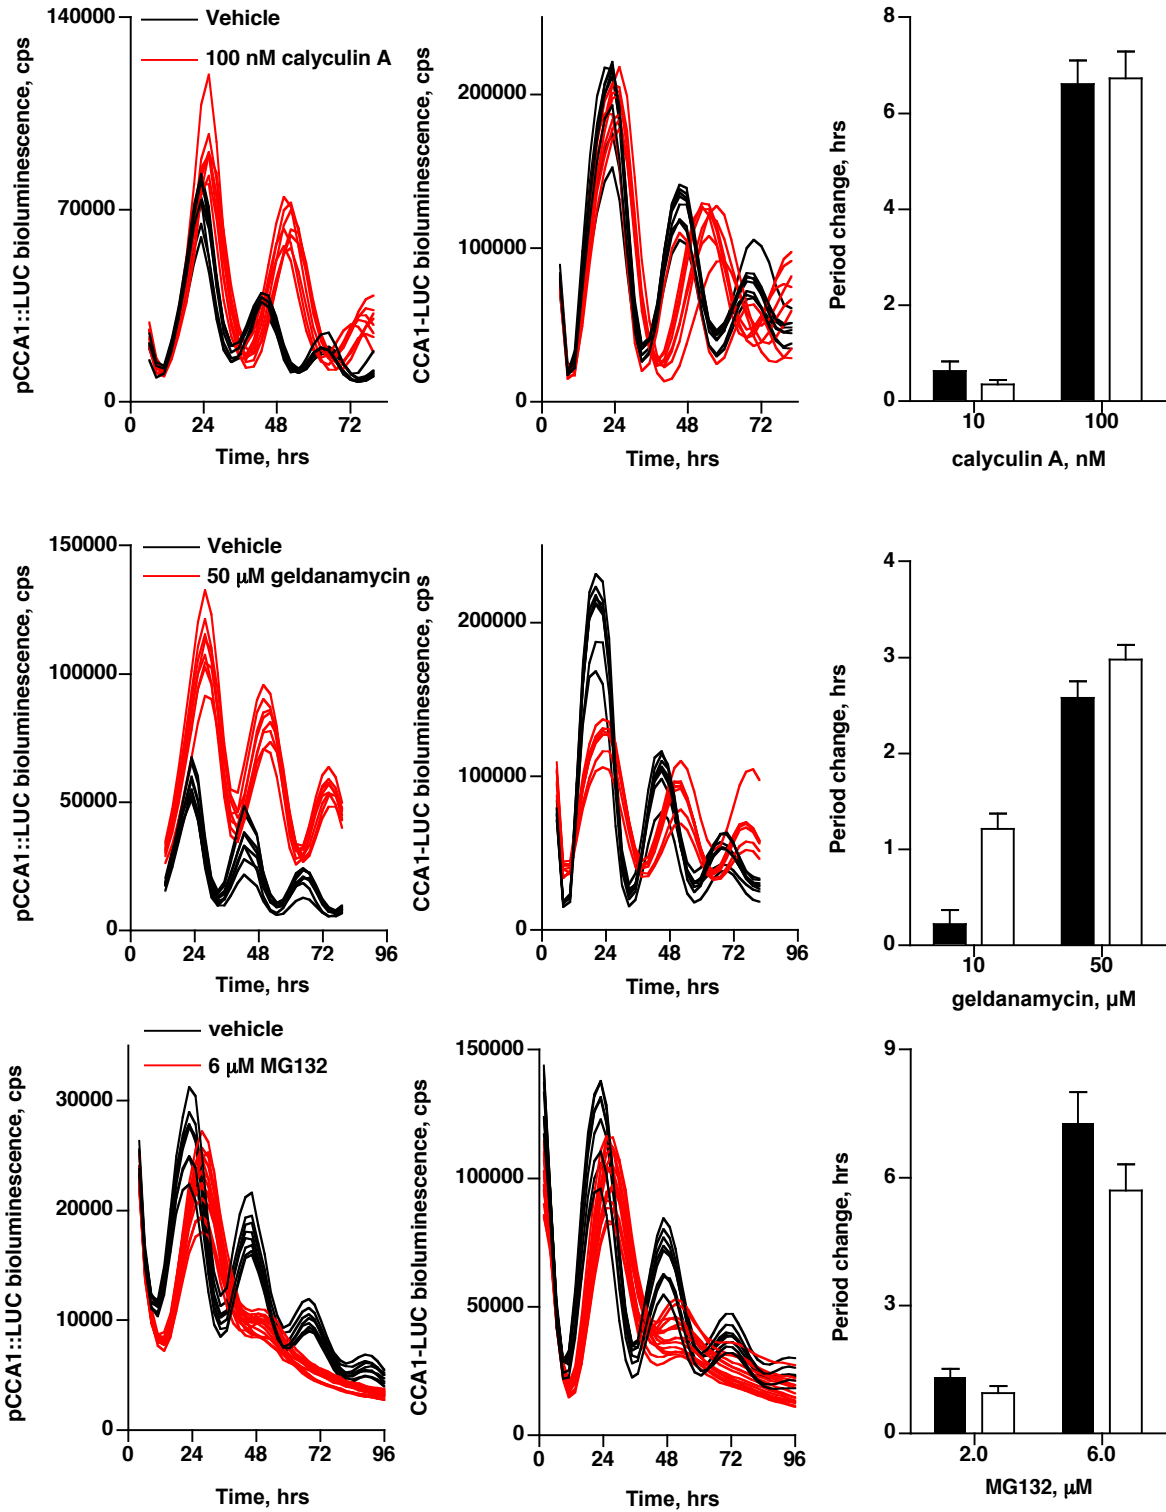

## O'Neill *et al*, Supplementary Figure 5-5

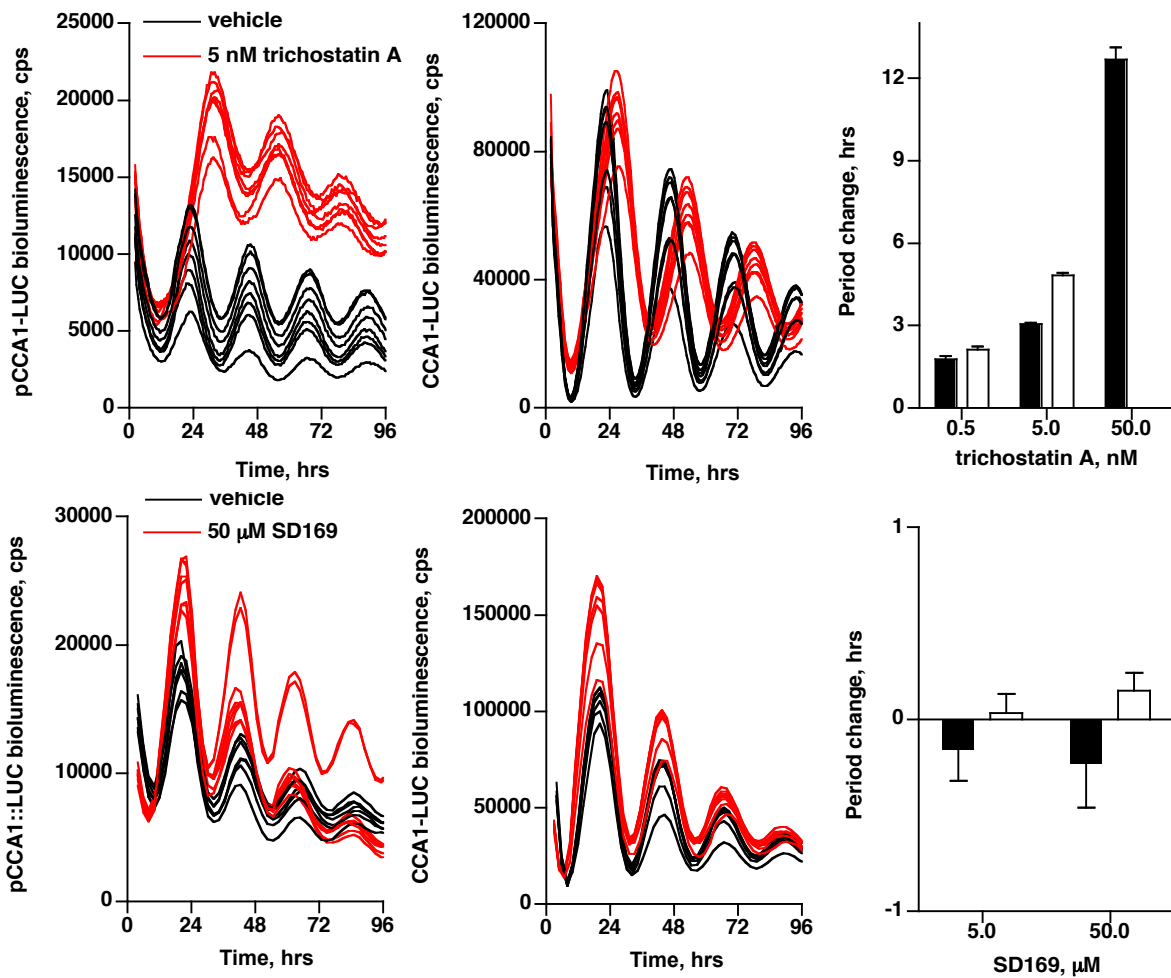

**Supplementary Figure 5. Representative and grouped data showing similar pharmacological actions on circadian period in *O. tauri* to those reported in other taxa.** Representative plots from transcriptional and translational reporter lines with grouped data showing period change relative to vehicle controls (white bars, pCCA1::LUC; black bars, CCA1-LUC;  $\pm$ SEM, 2-way ANOVA for concentration effect  $p < 0.0001$  for all compounds except control compound SD169,  $p = 0.90$ ,  $n \geq 8$ ).

## O'Neill *et al*, Supplementary Figure 6

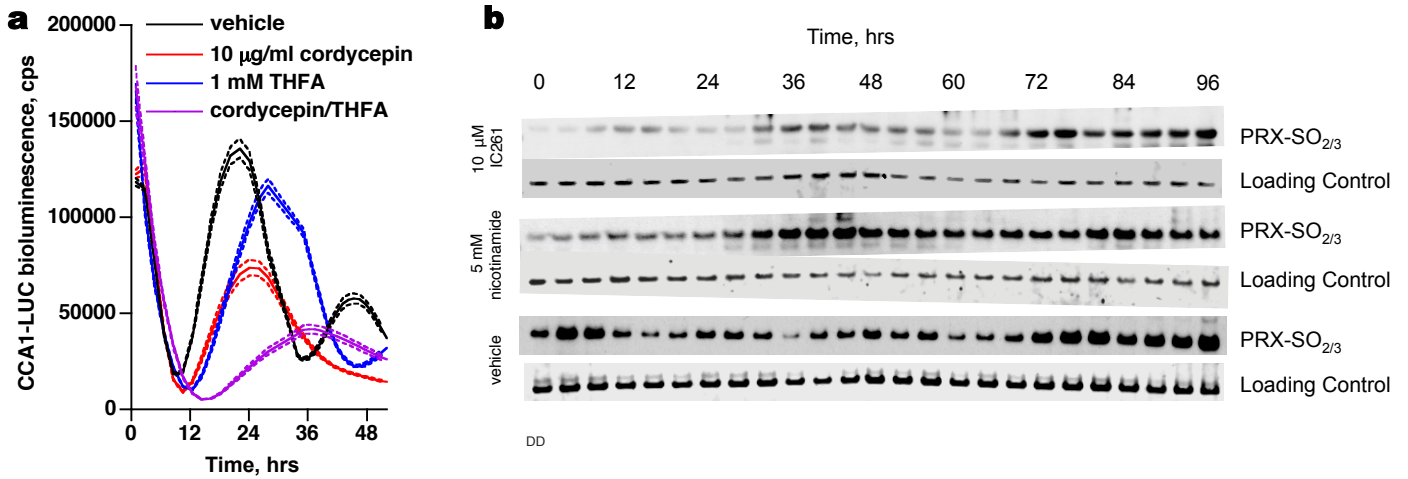

**Supplementary Figure 6. Representative and grouped data showing the effects of pharmacological modulators of circadian period in *O. tauri*, in the absence of transcription.** **a**, Grouped data showing CCA1-LUC reporter line under LL in the presence of cordycepin, THFA or both (n=8, mean ±SEM, dotted line). **b**, Immunoblots showing the effect of 5 mM nicotinamide or 10 µM IC261 on rhythms in PRX-SO<sub>2/3</sub> vs. vehicle in constant darkness.
